# Supplementary material
Source: PubMed Central journal article supplement (PMC3735840)

## SUPPORTING INFORMATION

### **Structural basis for enzyme I inhibition by $\alpha$ -ketoglutarate**

Vincenzo Venditti,<sup>1</sup> Rodolfo Ghirlando<sup>2</sup> and G. Marius Clore\*,<sup>1</sup>

*Laboratories of<sup>1</sup>Chemical Physics and<sup>2</sup>Molecular Biology, National Institute of Diabetes and Digestive and Kidney Diseases, National Institutes of Health, Bethesda, Maryland 20892-0520, USA.*

**Figure S1.** The  $c(s)$  distributions for EI obtained at different loading concentrations (ranging from  $\sim 130$  to  $\sim 2$   $\mu\text{M}$ ) based on sedimentation velocity interference data collected at 50 krpm and 20.0°C. Data acquired for the free EI (**a**) revealed concentration dependent  $c(s)$  interference profiles typical of a monomer-dimer equilibrium. In the presence of 20 mM PEP (**b**) and 20 mM  $\alpha\text{KG}$  (**c**) the sedimentation experiments indicate that EI is mainly dimeric and only traces of monomeric enzyme are detected.

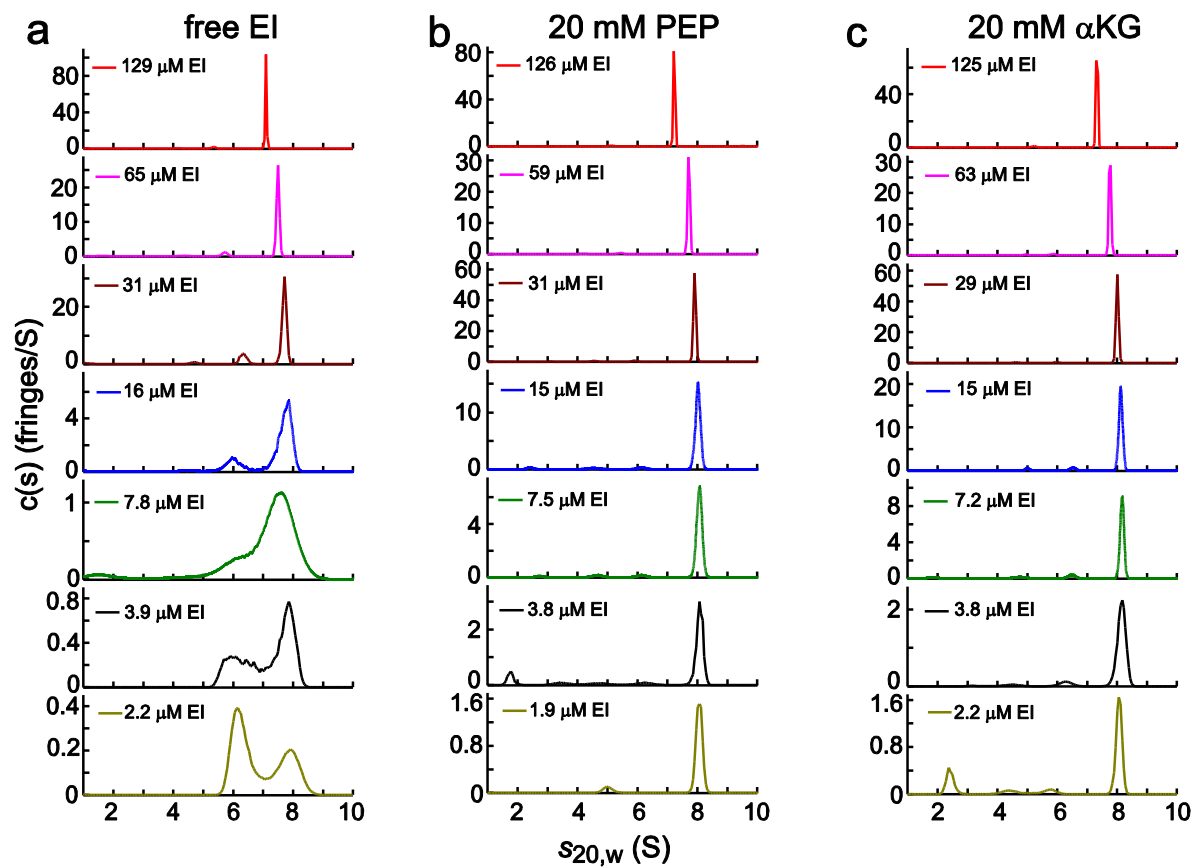

**Figure S2.** 600 MHz  $^1\text{H}$ - $^{15}\text{N}$  TROSY spectra of EIC acquired in the presence of 0, 1, 2 and 4 mM  $\alpha\text{KG}$ .

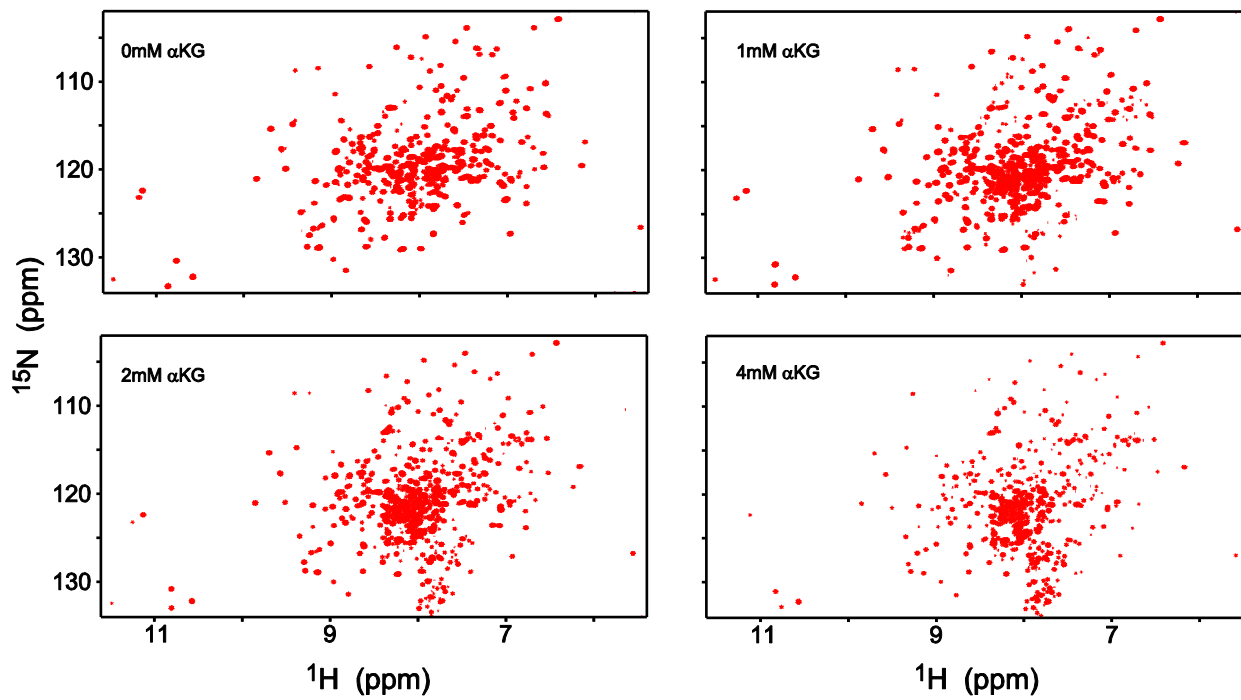

Supplement: NIHMS458716-supplement-1_si_001.pdf [file NIHMS458716-supplement-1_si_001.pdf]
